# Supplementary material
Source: Springer Nature journal article supplement (https://www.springermedizin.de/resource/supplementary/12889_2012_5295_MOESM1_ESM.pdf/9495056)
Supplement: MOESM1 [file 9495056]

Generated phone numbers: N=44,995

Not eligible: N=22,449

Eligible phone numbers: N=22,546

Never reached: N=3,922

Households reached: N=18,624

Refusals: N=11,283

Full interviews: N=7,341
